# Supplementary material
Source: Research Square preprint supplement (doi:10.21203/rs.3.rs-9381667/v1)
Supplement: Supplementary file 1 [file 1b4d48f96cd4e9461ea1872a.docx]

***Supplementary File 1****.*

Semi-Structured Interview Guide

Overview

This semi-structured interview guide was developed based on the quantitative results of Phase 1 to further explore the underlying psychological mechanisms, ethical considerations, and real-world experiences regarding AI-assisted nursing services. The guide is divided into two parts: one for patient representatives and another for nursing administrators/stakeholders. Interviewers are encouraged to use probing questions (e.g., "Could you elaborate on that?", "Can you give me a specific example?") to elicit in-depth responses.

**Part A: Interview Guide for Patient Representatives**

Introduction:

Thank you for taking the time to speak with me today. We are conducting this study to understand your real experiences when visiting the hospital and your thoughts on using Artificial Intelligence (AI) tools on your smartphone to help you with your healthcare needs. There are no right or wrong answers; we just want to hear your honest opinions and feelings. All your responses will be kept strictly confidential.

1. Could you describe a typical experience when you come to the hospital for an appointment? What are the most difficult or frustrating parts (e.g., finding the right department, queuing, making appointments)?
2. When you receive a medical test report or discharge instructions, how do you usually try to understand them? Do you feel you get enough time to discuss them with the nurses or doctors?
3. If you got lost in the hospital or didn’t know which department to visit, how would you like the AI assistant on your phone to help you?
4. (For patients with low e-health literacy): If you haven't used smartphone tools to help with your medical visits, what is the main reason? Do you feel unsure about what kind of assistance AI can actually provide?
5. How comfortable are you with using smartphone applications for healthcare? Who usually helps you if you can't figure it out?
6. What suggestions do you have for situations where older adults might not know how to use AI tools?(Probe: Voice interaction, larger fonts, dialect support, or simplified interfaces?)
7. As someone who visits the hospital frequently (e.g., for chronic disease management), how does the increasing use of digital screens and mobile phones in hospitals make you feel?
8. In our survey, we found that many patients are concerned about AI interpreting medical reports. Could you elaborate on what specifically worries you?
9. How do you feel about uploading your medical reports or personal health information to an AI platform? Do you have any concerns regarding your privacy?
10. Compared to talking face-to-face with a human nurse, how do you feel about interacting with an AI? What emotional or human elements do you think a machine cannot replace?

**Part B: Interview Guide for Nursing Administrators and Stakeholders**

Introduction:

Thank you for participating. As a healthcare professional/manager, your insights are crucial for understanding the feasibility, ethical boundaries, and policy implications of integrating AI-assisted nursing services into our clinical workflows. Your responses will remain anonymous.

1. If hospitals introduce AI to assist with patient triage or report interpretation, how do you think the role of nursing staff will change?
2. Our data shows that patients still heavily rely on human nurses for emotional support. How can we train nurses to effectively supervise AI outputs and become "prescribers" of digital tools based on a patient's digital literacy?
3. We found that patients who face the highest navigation barriers often lack the skills to use AI navigation tools. From a management perspective, how should hospitals ensure these vulnerable groups are not left behind during digital transformation?
4. What is your opinion on mandating the retention of manual consultation desks or creating "digital health stations" alongside the deployment of AI systems?
5. If AI provides inaccurate home care advice to patients, how do you think responsibility should be defined in terms of policy and ethics?
6. What specific quality control mechanisms or standard operating procedures (SOPs) must be established before AI tools are widely recommended to patients?
7. Should "AI-assisted nursing adverse events" be integrated into the hospital's existing adverse event reporting system? How would that process look?
8. In your current hospital environment, what are the biggest systemic, financial, or technical barriers to implementing an age-friendly, AI-driven care navigation system?
9. What specific recommendations would you make to health administration departments regarding the formulation of future "smart nursing" policies?
