# Supplementary material
Source: Research Square preprint supplement (doi:10.21203/rs.3.rs-9381667/v1)
Supplement: Supplementary file 2 [file 49df091f13a8fc058a1e0556.docx]

***Appendix Table S1***

Table S1.

Descriptive Statistics and Pearson Correlation Matrix of Continuous Variables

| Variables | Mean ± SD | 1 | 2 | 3 | 4 | 5 | 6 | 7 |
| --- | --- | --- | --- | --- | --- | --- | --- | --- |
| 1.Age | 45.62 ± 14.25 | 1 |  |  |  |  |  |  |
| 2. eHEALS | 28.45 ± 6.52 | -0.315** | 1 |  |  |  |  |  |
| 3. Navigation Barriers | 18.24 ± 4.31 | 0.242** | -0.185** | 1 |  |  |  |  |
| 4.Perceived usefulness | 15.65 ± 3.12 | -0.156** | 0.345** | 0.218** |  |  |  |  |
| 5.Perceived ease of use | 14.82 ± 3.45 | -0.284** | 0.412** | -0.085** | 0.456** | 1 |  |  |
| 6.Perceived risk | 12.35 ± 4.18 | 0.225** | -0.268** | 0.194** | -0.215** | -0.275** | 1 |  |
| 7.Use Intention | 18.29 ± 3.19 | -0.245** | 0.382** | 0.175** | 0.512** | 0.425** | -0.318** | 1 |
| Notes:**p ＜0.*p ＜0.05 | | | | | | | | |
