# Supplementary material
Source: Research Square preprint supplement (doi:10.21203/rs.3.rs-9381667/v1)
Supplement: Supplementary file 3 [file ff71130fc82d247ae6ec95eb.docx]

***Appendix Table S2***

Table S2.

Themes, Sub-themes, and Key data sources from Qualitative Interviews

| Main Dimensions | Sub-themes | Key data sources |
| --- | --- | --- |
| Dimension 1 Perceived Value & Health Literacy Divide | 1.1 Cognitive blind spots vs. active rejection | P13, P03 |
| 1.2 AI as a report translator | P01, P16 |
| 1.3 Nurses as AI 'prescribers' | M05 |
| Dimension 2 Perceived Risk as the Primary Barrier | 2.1 Technological distrust and AI hallucinations | P04, P17 |
| 2.2 Privacy and data leakage anxiety | P08 |
| 2.3 Emotional dependence vs. machine indifference | P19, M04, M01 |
| Dimension 3 The Navigation Barriers Paradox | 3.1 Digital divide and age barriers | P10 |
| 3.2 Family compensatory mechanism | P15 |
| 3.3 Irreplaceability of manual channels | P05, M03 |
| Dimension 4 Age × Chronic Disease: Compounded Vulnerability | 4.1 The powerlessness of 'being left behind' | P02 |
| 4.2 Exclusion from hospital digitalization | P10 |
| 4.3 Rigid demand for multimodal access | P12, M06, M08 |
| Dimension 5 Redefining Nursing Roles | 5.1 Assessors of AI literacy | M01 |
| 5.2 Supervisors and the last line of defense | M05 |
| 5.3 Human-machine collaborative decision-making | M07, P16 |
